# Supplementary material for: Rtf1 Transcriptionally Regulates Neonatal and Adult Cardiomyocyte Biology
Source: MDPI journal article supplement (doi:10.3390/jcdd10050221), 2023-05-20
Supplement: s1 [file s1]

**Table S1. Primers used for quantitative real-time PCR**

| <b>Gene</b>    | <b>Forward Primer</b>   | <b>Reverse Primer</b>   |
|----------------|-------------------------|-------------------------|
| <b>rPPIA</b>   | GTCAACCCCACCGTGTTCTTC   | ATCCTTTCTCCCCAGTGCTCAG  |
| <b>mRtf1</b>   | CAGTGATGATGAGTGGACATT   | CTTTGTTGGCTTGCTTCTTC    |
| <b>mFhl2</b>   | ATGACTGAACGCTTTGACTGC   | CGATGGGTGTTCCACACTCC    |
| <b>mLmna</b>   | GGATGCTGAGAACAGGCTACA   | CTCTCGCTGCTTCCCGTTATC   |
| <b>mMyh6</b>   | GCCCAGTACCTCCGAAAGTC    | GCCTTAACATACTCCTCCTTGTC |
| <b>mPdlim3</b> | TGGGGGCATAGACTTCAATCA   | CTCCGTACCAAAGCCATCAATAG |
| <b>mPln</b>    | CCTTCCTGGCATAATGGAAA    | CATGTTGCAGGTCTGGAGTG    |
| <b>mScn5a</b>  | ATGGCAAACCTTCCTGTTACCTC | CCACGGGCTTGTTTTTCAGC    |
| <b>mTnni3</b>  | TCTGCCAACTACCGAGCCTAT   | CTCTTCTGCCTCTCGTTCCAT   |
| <b>mTtn</b>    | CTACGTGGTAGAAAAGCGAGAAA | ACACCGTACTTGTTGACAGCC   |
| <b>mEef1e1</b> | TCCAGTAAAGAAGACACCCAGA  | GACAAAACCAGCGAGACACA    |
